# Supplementary material for: The determination of underivatized chlormequat, fosetyl-aluminium and phosphonic acid residues in maize and soybean by LC-MS/MS
Source: Royal Society of Chemistry journal article supplement (doi:10.1039/d3ay01874a), 2023-11-30
Supplement: d3ay01874a1.pdf [file d3ay01874a1.pdf]

## Determination of underivatized chlormequat, fosetyl-aluminium and phosphonic acid residues in maize and soybean by LC-MS/MS

Hao Yang <sup>a,b,c</sup>, Yue Geng\* <sup>a,b,c</sup>, Shu Lin <sup>a,b,c</sup>, Lu Wang <sup>a,b,c</sup>, Yi Peng <sup>a,b,c</sup>, Yaping Xu <sup>a,b,c</sup>, Jingran Zhang <sup>d</sup>, and Xiaowei Liu <sup>a,b,c</sup>

Table S1 Summary information for the detection of chlormequat, fosetyl-aluminium and phosphonic acid residues

| Target analyte/food matrix                                                                                           | Extraction                                                                                               | Clean up                                                          | Instrumental analysis | Analysis of time and organic solvents                                                                    | LOQ ( $\mu\text{g kg}^{-1}$ ) | Recovery range (%)                                                                             | Matrix effects (%)                                                                           | Derivation time | spiked level                            |
|----------------------------------------------------------------------------------------------------------------------|----------------------------------------------------------------------------------------------------------|-------------------------------------------------------------------|-----------------------|----------------------------------------------------------------------------------------------------------|-------------------------------|------------------------------------------------------------------------------------------------|----------------------------------------------------------------------------------------------|-----------------|-----------------------------------------|
| chlormequat, fosetyl-aluminium and phosphonic acid/maize and soybean (the present study)                             | 2 g sample (57.2 $\mu\text{L}$ acetic acid solution, 30 mL dichloromethane)                              | Oasis HLB (Waters) SPE                                            | LC-MS/MS              | 15 min, 0 mL                                                                                             | 10                            | Chlormequat: 85.0 -106.4, fosetyl-aluminium: 81.7 - 84.6, 109.5, phosphonic acid: 74.7 - 104.4 | Chlormequat: -56.9 - -72.7, fosetyl-aluminium: -71.9 - -52.1, phosphonic acid: -52.1 - -72.7 | NO              | 0.05, 0.1, 1 $\text{mg kg}^{-1}$        |
| chlormequat/pears, potatoes <sup>1</sup>                                                                             | 5 g sample (3.5 mL acetonitrile)                                                                         | SPE (25 mg PSA, 25 mg GCB and 125 mg $\text{MgSO}_4$ )            | HPLC-MS/MS            | 3.5 min, 0.805 mL (A: methanol, B: 20 $\text{mmol L}^{-1}$ ammonium acetate containing 0.1% formic acid) | 0.35                          | 87.6 -105.8                                                                                    | 16.1 (pear) 27.7 (potato)                                                                    | NO              | 0.35, 35, 140 $\mu\text{g kg}^{-1}$     |
| chlormequat/fresh fruit, fruit juices, vegetables, mushrooms, bread, baby foods, beer and coffee powder <sup>2</sup> | 10 g sample (25 mL methanol: ammonium formate = 1: 4), 1 g coffee (10mL methanol: ammonium formate=1: 4) | C18 SPE (5 mL methanol, 5 mL (methanol: ammonium formate = 1: 4)) | LC-MS/MS              | 4 min, 1.6 mL (A: acetonitrile B: methanol containing 50 $\text{mmol L}^{-1}$ ammonium formate)          | 5 (apple and beer)            | >78                                                                                            | Not reported                                                                                 | NO              | beer and apple: 5 $\mu\text{g kg}^{-1}$ |

| Target analyte/food matrix                                                 | Extraction                                                         | Clean up                                                                                                                   | Instrumental analysis | Analysis of time and organic solvents                                                                                            | LOQ ( $\mu\text{g kg}^{-1}$ ) <sup>1)</sup> | Recovery range (%)             | Matrix effects (%)                                                         | Derivation time | spiked level                                     |
|----------------------------------------------------------------------------|--------------------------------------------------------------------|----------------------------------------------------------------------------------------------------------------------------|-----------------------|----------------------------------------------------------------------------------------------------------------------------------|---------------------------------------------|--------------------------------|----------------------------------------------------------------------------|-----------------|--------------------------------------------------|
| chlormequat/barley and wheat <sup>3</sup>                                  | 5 g sample (20 mL methanol: water = 1: 1)                          | PSA+C18 d-SPE                                                                                                              | UHPLC-MS/MS           | 4 min, 1 mL (A: 60 mmol L <sup>-1</sup> ammonium formate 40%, B: acetonitrile 60%)                                               | 20                                          | barley: 93 -110 wheat: 70 -115 | -92                                                                        | NO              | 20, 40, 80, 200, 400, 1000 $\mu\text{g kg}^{-1}$ |
| chlormequat/grain <sup>4</sup>                                             | 10 g sample (60 mL methanol: water: acetic acid = 75: 24: 1)       | C18 SPE (5 mL methanol, 3 mL containing 50 mmol L <sup>-1</sup> ammonium acetate methanol: water: acetic acid = 50: 49: 1) | LC-MS/MS              | 15 min, 3.75 mL (acetonitrile: methanol: water: acetic acid = 53: 21: 25: 1 containing 50 mmol L <sup>-1</sup> ammonium acetate) | 50                                          | 89 -99                         | Not reported                                                               | NO              | 0.05, 0.2, 1, 5 mg kg <sup>-1</sup>              |
| chlormequat/tomato or lemon, and chia seed, wheat, or sultana <sup>5</sup> | 7 g sample (20 mL water: methanol: hydrochloric acid = 50: 25: 25) | NO                                                                                                                         | LC-MS/MS              | 16 min, 6.4 mL (A: formic acid containing 20 mmol L <sup>-1</sup> ammonium formate, B: acetonitrile)                             | 10                                          | 77 -120                        | 67                                                                         | NO              | 0.01, 0.1 mg kg <sup>-1</sup>                    |
| chlormequat/ rice, wheat flour, pear, tomato and ketchup <sup>6</sup>      | water and methanol (1: 1)                                          | Strata-X-C SPE                                                                                                             | LC-MS/MS              | 3.3 min, 0.198 mL acetonitrile, 0.792 mL 10 mmol L <sup>-1</sup> Ammonium acetate aqueous solution containing 0.1% formic acid   | 0.2                                         | 82 -102                        | rice: -8.2, wheat flour: -14.8, pear: -13.8, tomato: -14.5, ketchup: -11.6 | NO              | 0.2, 5.0, 10 $\mu\text{g kg}^{-1}$               |

| Target analyte/food matrix                                                                  | Extraction                                                                                                            | Clean up                                | Instrumental analysis | Analysis of time and organic solvents                                | LOQ ( $\mu\text{g kg}^{-1}$ ) <sup>1)</sup> | Recovery range (%) | Matrix effects (%)                                                         | Derivation time | spiked level                       |
|---------------------------------------------------------------------------------------------|-----------------------------------------------------------------------------------------------------------------------|-----------------------------------------|-----------------------|----------------------------------------------------------------------|---------------------------------------------|--------------------|----------------------------------------------------------------------------|-----------------|------------------------------------|
| fosetyl/apple <sup>7</sup>                                                                  | sulfuric acid (1%)                                                                                                    | NO                                      | GC                    | 30.5 min                                                             | 1000                                        | 71.3 -119.9        | Not reported                                                               | >30min          | 1.0, 5.0, 10.0 mg kg <sup>-1</sup> |
| fosetyl/commercial pesticide formulations (wetable powder containing 50% mass) <sup>8</sup> | water                                                                                                                 | NO                                      | HPLC                  | 11 min, 0.5206 mL acetonitrile, 0.002739 mL formic acid              | 0.1                                         | 96.7 -100.6        | Not reported                                                               | NO              | 100, 250, 500 mg kg <sup>-1</sup>  |
| fosetyl/cabbage <sup>9</sup>                                                                | 20 mL acetonitrile                                                                                                    | 100 mg MgSO <sub>4</sub> and 100 mg PSA | LC-MS/MS              | 10 min, 2.5 mL (A: acetonitrile, B: 0.05% formic acid)               | 10                                          | 82 -107            | ethyl phosphonic acid: 80, phosphorous acid: 103                           | NO              | 0.01, 0.1, 0.5 mg kg <sup>-1</sup> |
| fosetyl/tomato, apple, lemon, sultana, avocado and wheat <sup>10</sup>                      | 10 g sample (10 mL methanol containing 1% formic acid)                                                                | NO                                      | IC-MS/MS              | 25 min (acetonitrile: 1.397 mL)                                      | 10                                          | 76 -113            | Apple: -1, wheat: -80, sultana: -75, tomato: -42, lemon: -76, avocado: -19 | NO              | 0.01, 0.1 mg kg <sup>-1</sup>      |
| fosetyl aluminum/grape <sup>11</sup>                                                        | 5 g sample 16 mL (50 mmol L <sup>-1</sup> acetic acid, 10 mmol L <sup>-1</sup> Na <sub>2</sub> EDTA: methanol = 3: 1) | Oasis HLB SPE                           | LC-MS-MS              | 17 min (formic acid: 6.5 mL ammonium formate: 0.6549 $\mu\text{L}$ ) | 100                                         | 87 -111            | 7 -13                                                                      | NO              | 0.1, 0.5, 2 mg kg <sup>-1</sup>    |

## References

- 1 J. Gao, J. Wang, M. Zuo, L. Ma, Y. Cui, T. Yang and M. Ding, *RSC advances*, 2015, 5, 5895-5903.
- 2 X. Esparza, E. Moyano and M. T. Galceran, *Journal of Chromatography A*, 2009, 1216, 4402-4406.
- 3 J. Z. Francesquett, T. M. Rizzetti, T. J. Cadaval, O. D. Prestes, M. B. Adaime and R. Zanella, *J Chromatogr A*, 2019, 1592, 101-111.
- 4 M. Vahl, A. Graven and R. K. Juhler, *Fresenius' journal of analytical chemistry*, 1998, 361, 817-820.
- 5 A. Bauer, J. Luetjohann, S. Rohn, J. Kuballa and E. Jantzen, *Food analytical methods*, 2018, 11, 2237-2243.
- 6 L. Lu, X. Luo, Y. Wang and J. Hao, *Journal of Instrumental Analysis*, 2011, 30, 321-325.
- 7 L. Sun, Z. Chi, X. Liu and X. Yu, *Agrochemicals*, 2009, 48, 747-748+759.
- 8 H. Karasali, K. M. Kasiotis and K. Machera, *Chemical papers*, 2014, 68, 725-731.
- 9 B. Han, Y. He, B. Lin, H. Huang, L. Chen and L. Xu, *Chinese Journal of Pesticide Science*, 2017, 19, 403-408.
- 10 A. Bauer, J. Luetjohann, S. Rohn, J. Kuballa and E. Jantzen, *Journal of Agricultural and Food Chemistry*, 2018, 66, 346-350.
- 11 N. Chamkasem, *J Agric Food Chem*, 2017, 65, 7535-7541.
